# Supplementary material for: A novel strategy for the synthesis of hollow Pt–Cu tetradecahedrons as an efficient electrocatalyst toward methanol oxidation
Source: Royal Society of Chemistry journal article supplement (doi:10.1039/c9ce00039a), 2019-01-01
Supplement: c9ce00039a1.pdf [file c9ce00039a1.pdf]

## Supporting Information Available

### **Novel strategy for synthesis of hollow Pt-Cu tetradecahedrons as an efficient electrocatalyst toward methanol oxidation**

Ruopeng Zhao,<sup>‡a,b</sup> Gengtao Fu,<sup>‡d</sup> Zhijing Chen,<sup>a</sup> Yawen Tang,<sup>c,\*</sup> Yi Wang<sup>b,\*</sup> and Shaoming Huang<sup>a,\*</sup>

a. School of Materials and Energy, Guangdong University of Technology, Guangzhou, 510006, PR China.

b. Wenzhou Institute of Biomaterials and Engineering, Chinese Academy of Sciences, Wenzhou, 325000, PR China.

c. Jiangsu Key Laboratory of New Power Batteries, Jiangsu Collaborative Innovation Center of Biomedical Functional Materials, School of Chemistry and Materials Science, Nanjing Normal University, Nanjing 210023, PR China.

d. School of Chemical and Biomedical Engineering, Nanyang Technology University, Singapore 637459, Singapore 637459, Singapore.

E-mail: tangyawen@njnu.edu.cn (Yawen Tang); wangyi@wibe.ac.cn (Yi Wang); smhuang@gdut.edu.cn (Shaoming Huang)

‡ These authors contributed equally to this work

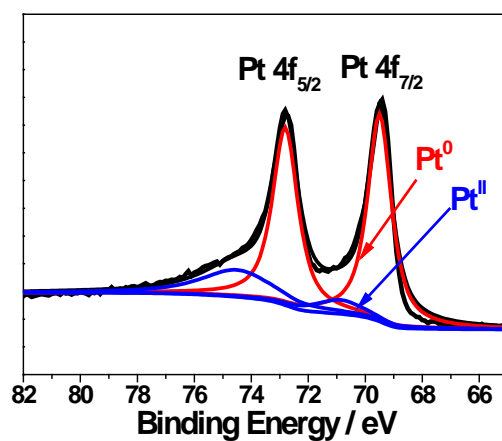

Figure S1. XPS spectra of Pt-Cu TNs in Pt 4f region.

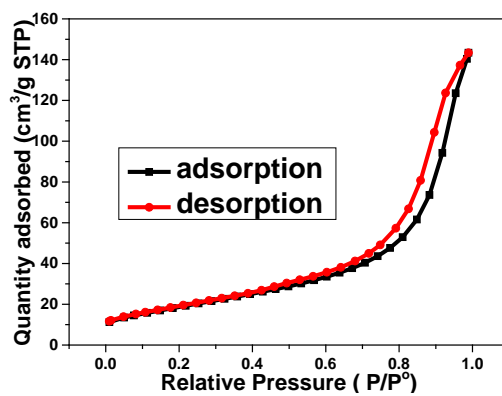

Figure S2. N<sub>2</sub> adsorption analysis of Pt-Cu TNs: N<sub>2</sub> adsorption-desorption isotherms

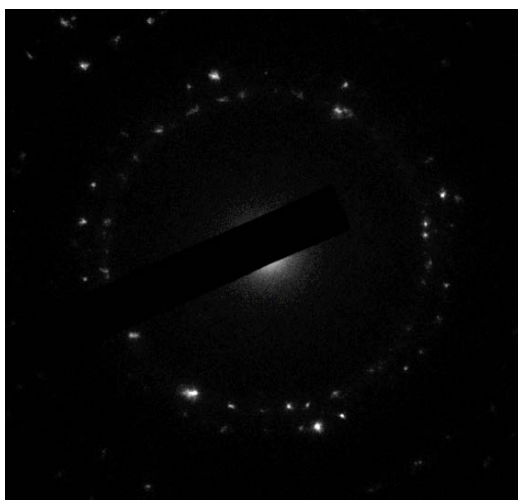

**Figure S3.** The SAED pattern of Pt-Cu TNs.

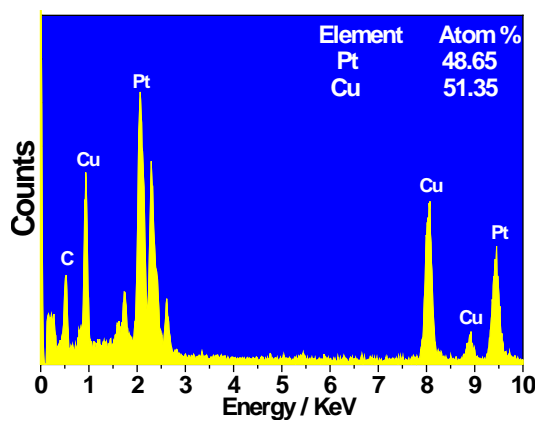

**Figure S4.** The EDX pattern of Pt-Cu TNs.

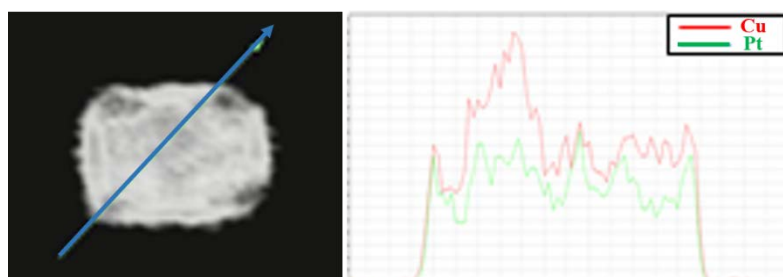

Figure S5. EDS line scanning profiles of Pt-Cu TNs.

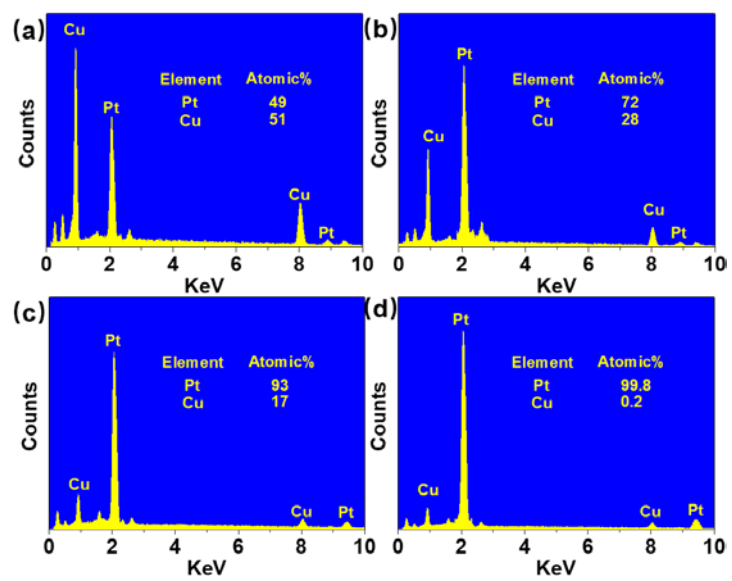

Figure S6. (a, b, c, d) EDX results of the Pt-Cu TNs tailored by different amounts of the  $K_2PtCl_6$ .

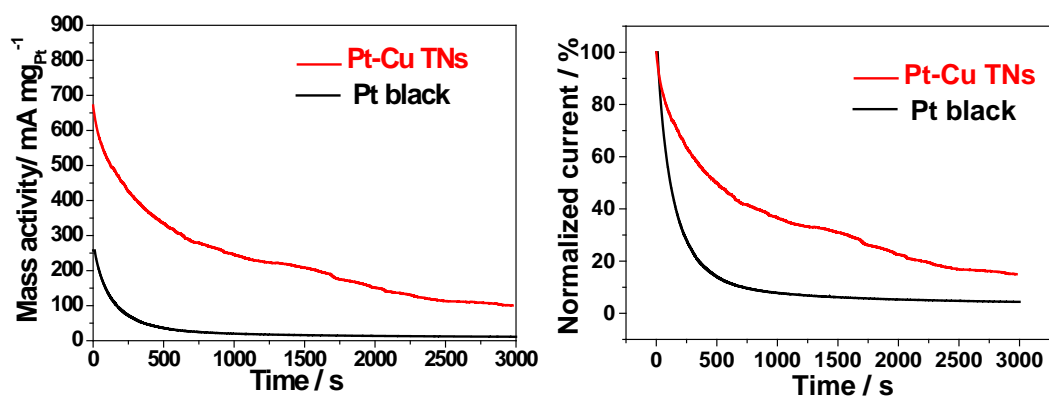

**Figure S7. Chronoamperometry curves for Pt-Cu TNs and Pt black measured in a solution of 1 M methanol and 0.5 M H<sub>2</sub>SO<sub>4</sub> for 3000 s at 0.65 V and its time-dependent relative current curves**

**Table S1 Activity comparison of Pt-based catalysts toward methanol oxidation reaction**

| No | Catalysts                                                               | Mass Activity<br>(A mg <sup>-1</sup> Pt) | Specific Activity<br>(mA cm <sup>-2</sup> ) | Electrolyte                                                                | Ref.                                            |
|----|-------------------------------------------------------------------------|------------------------------------------|---------------------------------------------|----------------------------------------------------------------------------|-------------------------------------------------|
| 1  | Pt-Cu TNs                                                               | 0.88                                     | 2.5                                         | 1 M CH <sub>3</sub> OH and 0.5 M H <sub>2</sub> SO <sub>4</sub> solution   | Our work                                        |
| 2  | stars-like PtCu/rGO                                                     | 0.67                                     | /                                           | 1 M CH <sub>3</sub> OH and 0.5 M H <sub>2</sub> SO <sub>4</sub> solution   | Electrochimica Acta, 2015, <b>177</b> , 86-92   |
| 3  | Pt <sub>17</sub> Pd <sub>16</sub> Ru <sub>22</sub> Te <sub>45</sub> NTs | 1.26                                     | 2.96                                        | 1 M CH <sub>3</sub> OH and 0.5 M H <sub>2</sub> SO <sub>4</sub> solution   | J. Am. Chem. Soc. 2017, <b>139</b> , 5890-5895  |
| 4  | Pt <sub>95</sub> Co <sub>5</sub> nanowires                              | 0.49                                     | 2.13                                        | 1 M CH <sub>3</sub> OH and 0.5 M H <sub>2</sub> SO <sub>4</sub> solution   | Nano Research 2018, <b>11</b> , 2562-2572       |
| 5  | Pt-Ru Nanocrystals                                                      | 0.82                                     | 1.16                                        | 0.1 M HClO <sub>4</sub> and 0.5 M CH <sub>3</sub> OH solution              | J. Am. Chem. Soc. 2018, <b>140</b> , 1142-1147  |
| 6  | Pt/S-MWCNT                                                              | 0.80                                     | /                                           | 0.5 M CH <sub>3</sub> OH and 0.5 M H <sub>2</sub> SO <sub>4</sub> solution | J. Mater. Chem. A, 2017, <b>5</b> , 19467-19475 |
| 7  | hierarchical Pt-Ni nanoroses                                            | 0.35                                     | /                                           | 1 M CH <sub>3</sub> OH and 0.5 M H <sub>2</sub> SO <sub>4</sub> solution   | CrystEngComm, 2017, <b>19</b> , 4964-4971       |
| 8  | Pd@Pt core-shell hexapods                                               | 0.52                                     | 1.97                                        | 0.5 M CH <sub>3</sub> OH and 0.5 M H <sub>2</sub> SO <sub>4</sub> solution | Nanoscale, 2017, <b>9</b> , 11077-11084         |
| 9  | bimetallic Au@Pt core-shell nanoparticle                                | 0.4                                      | 0.68                                        | 0.5 M CH <sub>3</sub> OH and 0.5 M H <sub>2</sub> SO <sub>4</sub> solution | Scientific Reports, 2017, <b>7</b> , 6347-6356  |
| 10 | Pt-Co-P-11.9/CNT                                                        | 0.53                                     | 0.62                                        | 0.5 M CH <sub>3</sub> OH and 0.5 M H <sub>2</sub> SO <sub>4</sub> solution | Electrochimica Acta, 2017, <b>215</b> , 447-454 |
| 11 | Pt Nanowires with Ordered Large Mesopores                               | 0.4                                      | 1                                           | 1 M CH <sub>3</sub> OH and 0.5 M H <sub>2</sub> SO <sub>4</sub> solution   | Scientific Reports 2016, <b>6</b> , 31440-31448 |
